# Supplementary material for: SNHG12 Promotes Autophagy by Blocking the mTOR-Primary Cilia-mTOR Loop via Activating the miR-181a-5p/miR-138-5p-INPP5E Axis in Chondrocyte
Source: Hindawi journal article supplement (doi:10.1155/2024/4887984), 2024-03-28
Supplement: f1 [file 4887984.f1.zip]

Archive with 2 entries (2 files):
- Supplement material (Not for publication) . Original protein expression bands.pdf
- Supplementary materials (1).docx
