# Supplementary material for: SNHG12 Promotes Autophagy by Blocking the mTOR-Primary Cilia-mTOR Loop via Activating the miR-181a-5p/miR-138-5p-INPP5E Axis in Chondrocyte
Source: Hindawi journal article supplement (doi:10.1155/2024/4887984), 2024-03-28
Supplement: f1 [file 4887984.f1.zip › Supplement material (Not for publication) . Original protein expression bands.pdf]

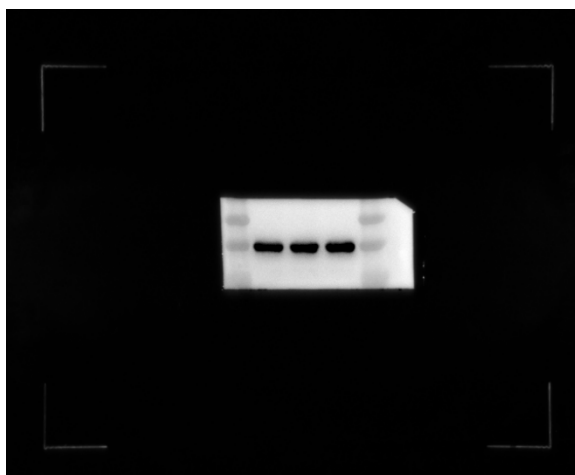

BLACK-GAPDH-GROUP1

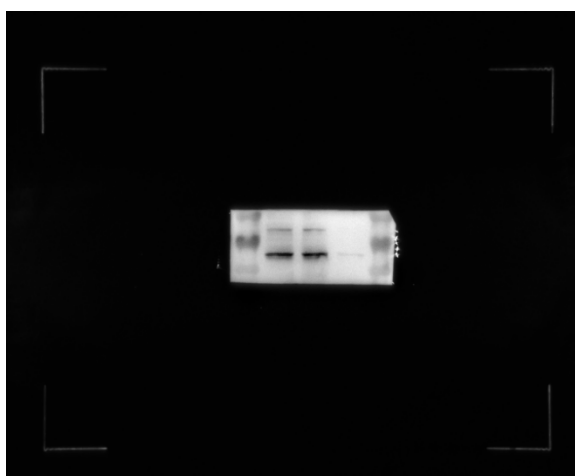

BLACK-IINPP5E-GROUP1

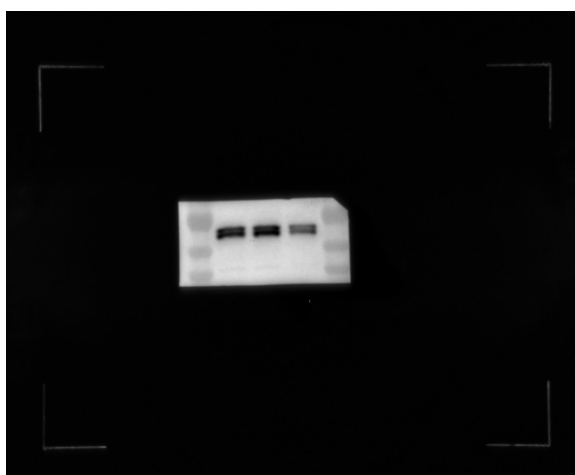

BLACK-Beclin1-GROUP2

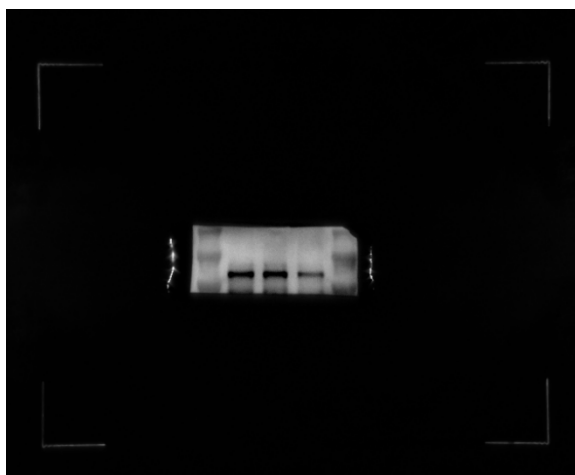

BLACK-COL II-GROUP2

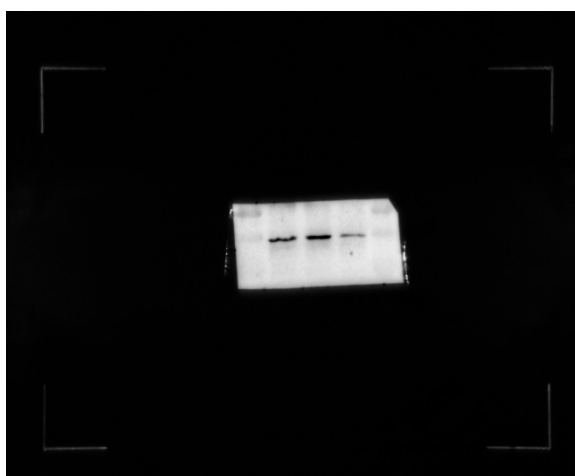

BLACK-Cyclin D1-GROUP2

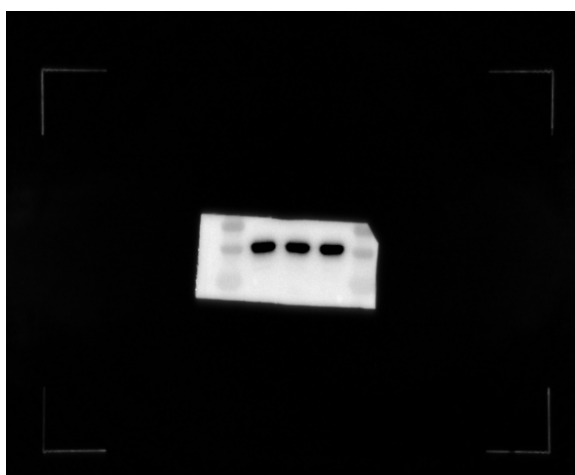

BLACK-GAPDH-GROUP2

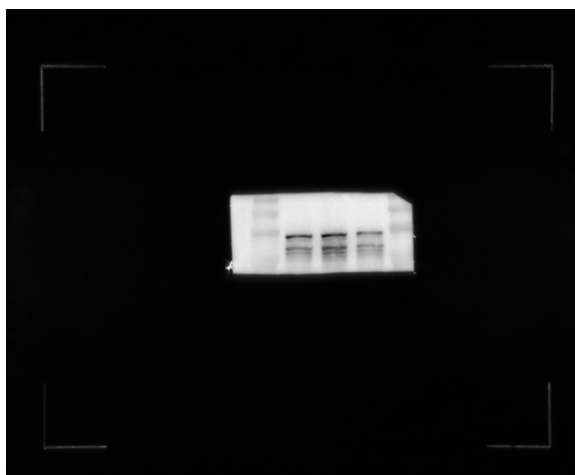

BLACK-IFT88-GROUP2

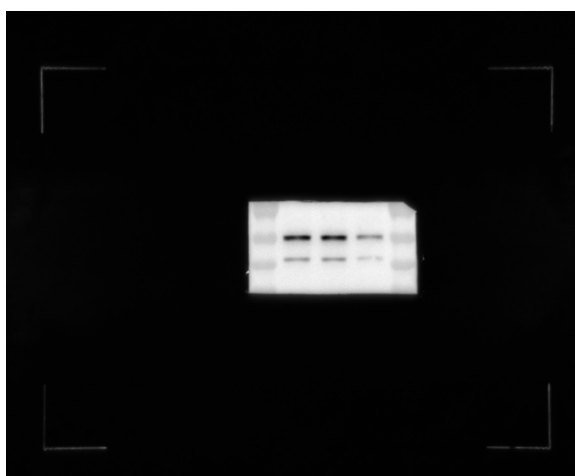

BLACK-LC3-GROUP2

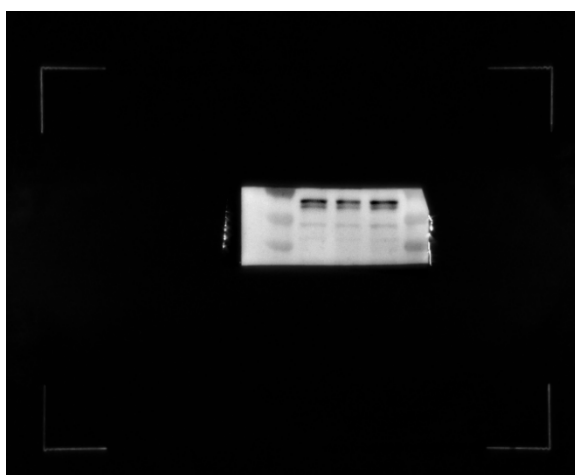

BLACK-Akt-GROUP3

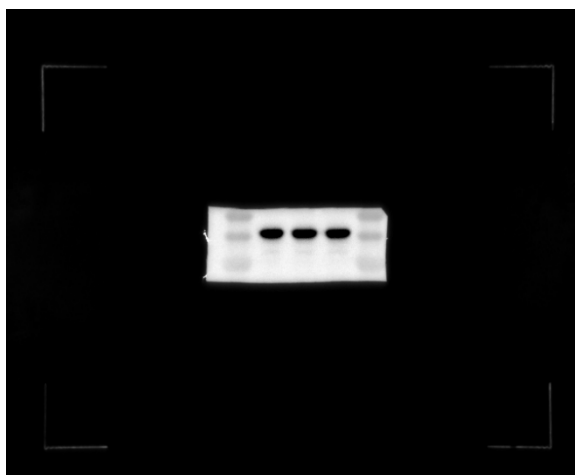

BLACK-GAPDH-GROUP3

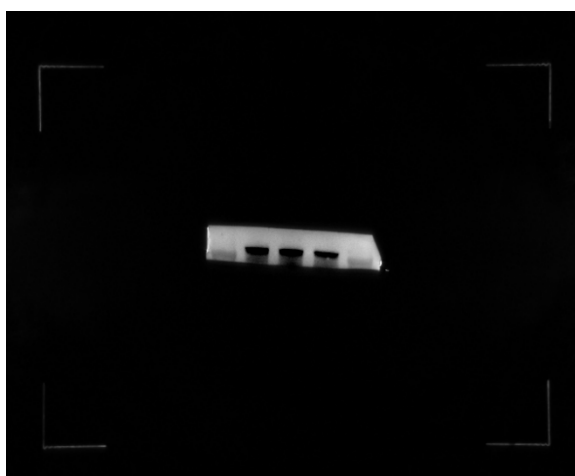

BLACK-mTOR-GROUP3

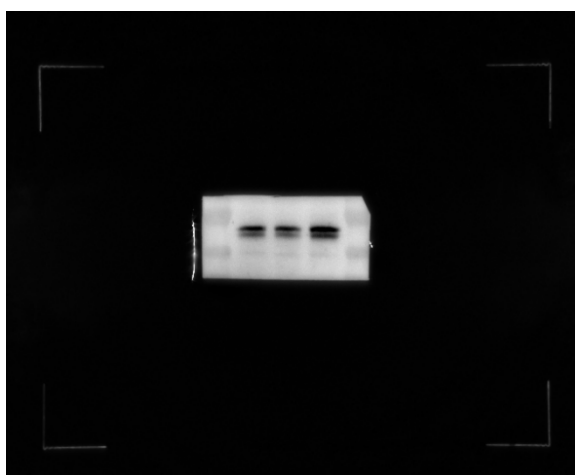

BLACK-p-Akt-GROUP3

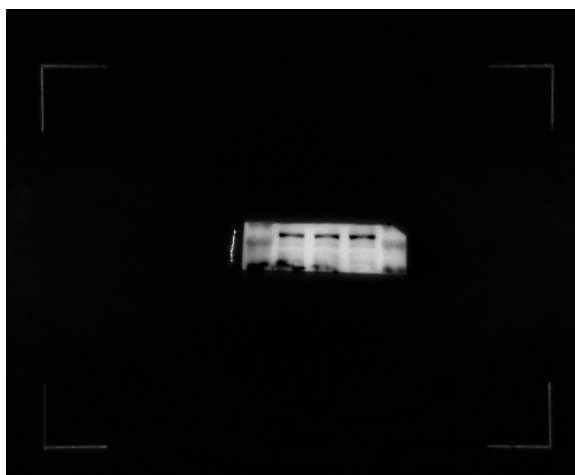

BLACK-PI3K-GROUP3

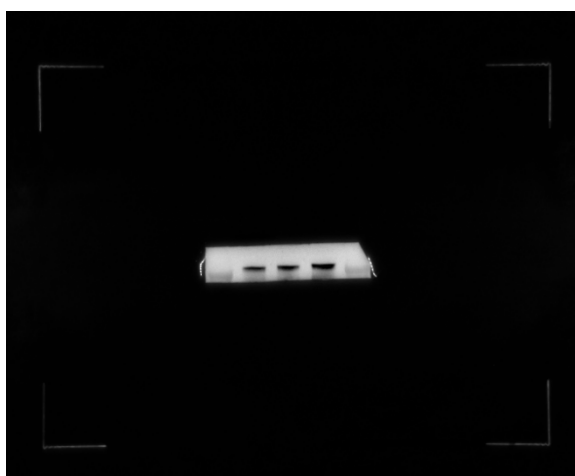

BLACK-p-mTOR-GROUP3

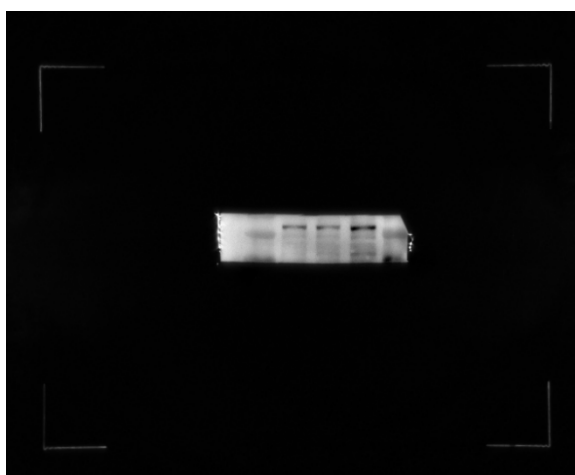

BLACK-p-PI3K-GROUP3

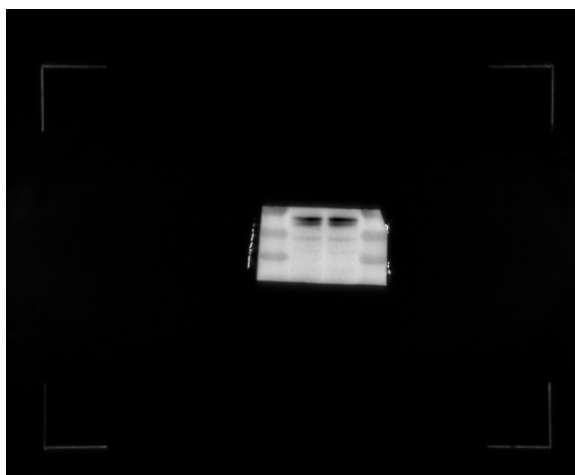

BLACK-AKT-GROUP4

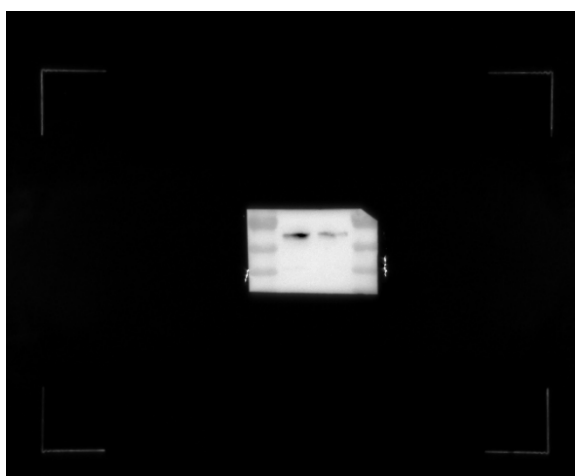

BLACK-Beclin1-GROUP4

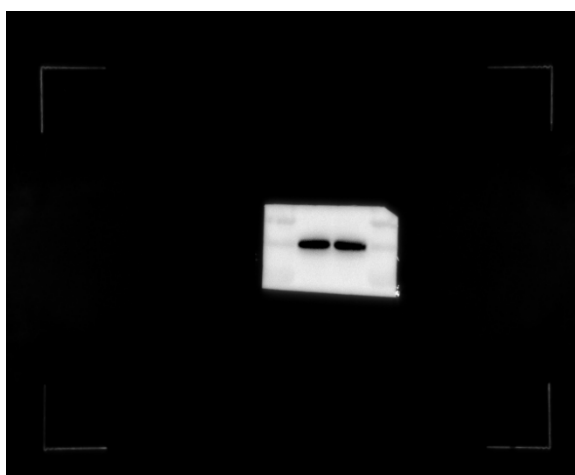

BLACK-GAPDH-GROUP4

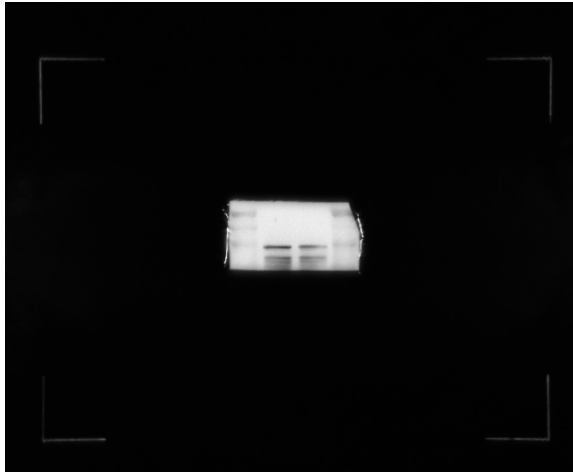

BLACK-IFT88-GROUP4

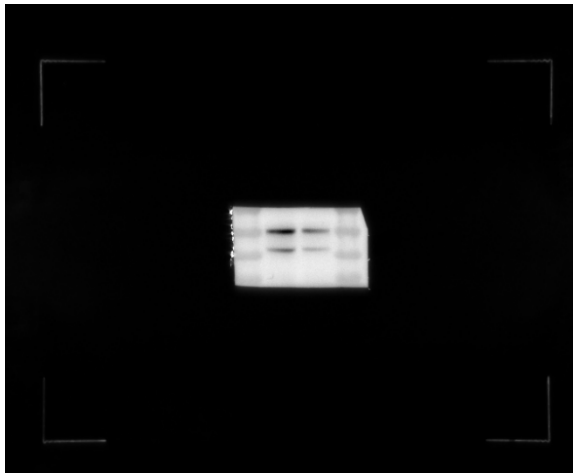

BLACK-LC3-GROUP4

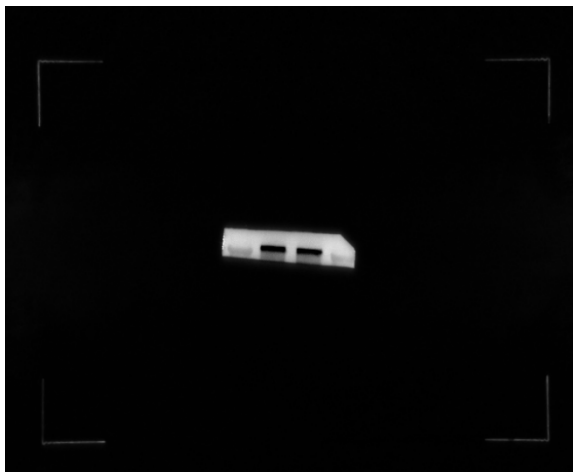

BLACK-mTOR-GROUP4

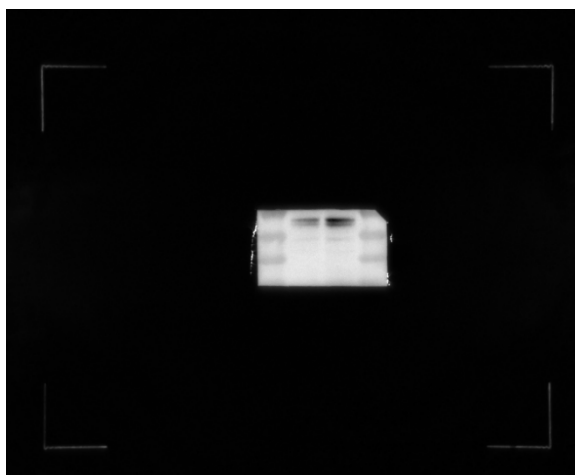

BLACK-p-AKT-GROUP4

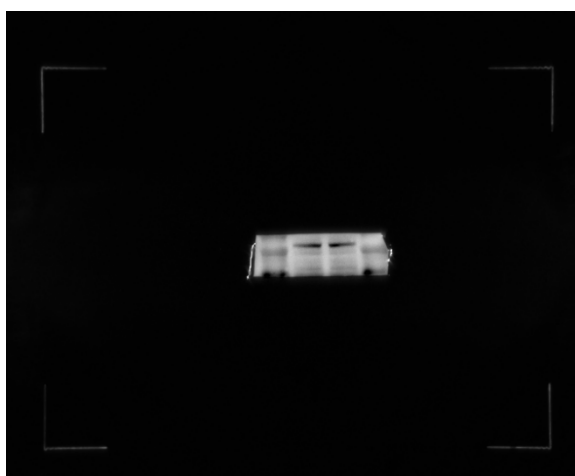

BLACK-PI3K-GROUP4

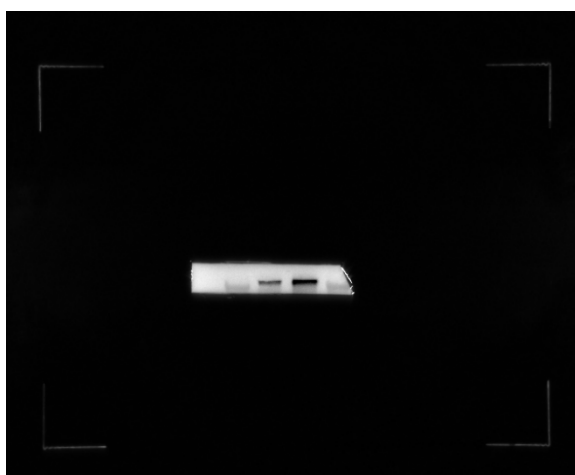

BLACK-p-mTOR-GROUP4

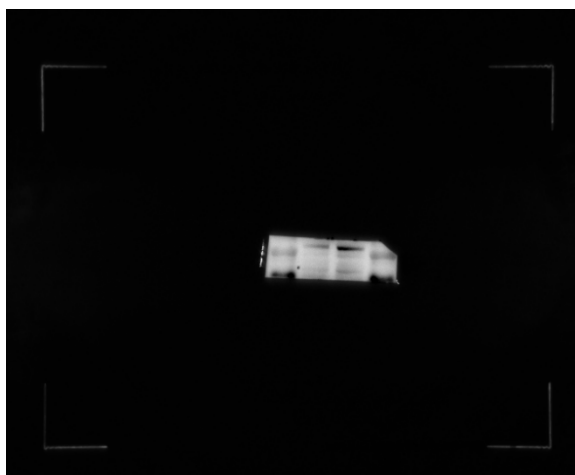

BLACK-p-PI3K-GROUP4

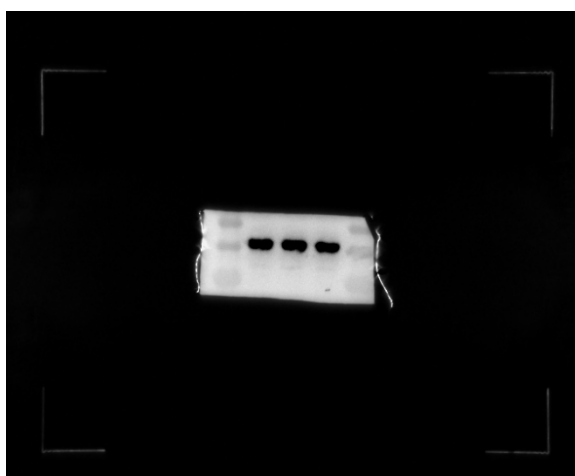

BLACK-GAPDH-GROUP5

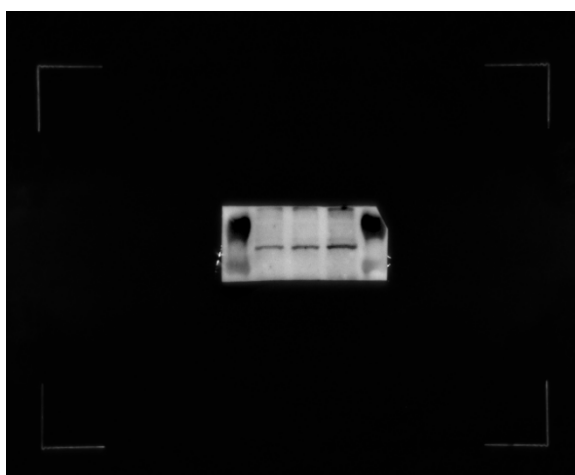

BLACK-INPP5E-GROUP5

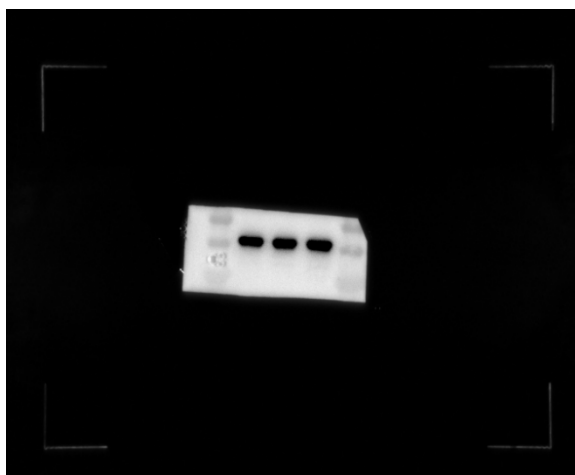

BLACK-GAPDH-GROUP6

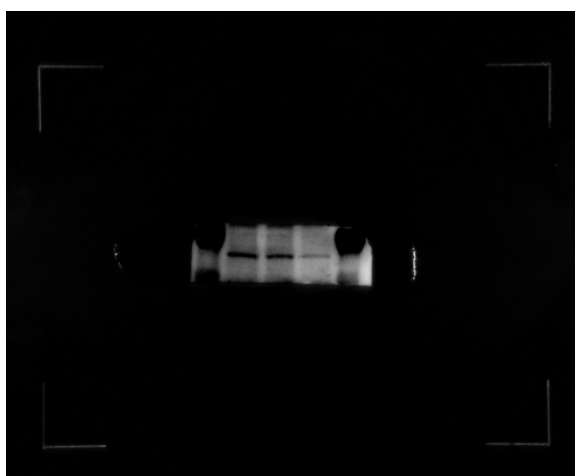

BLACK-INPP5E-GROUP6

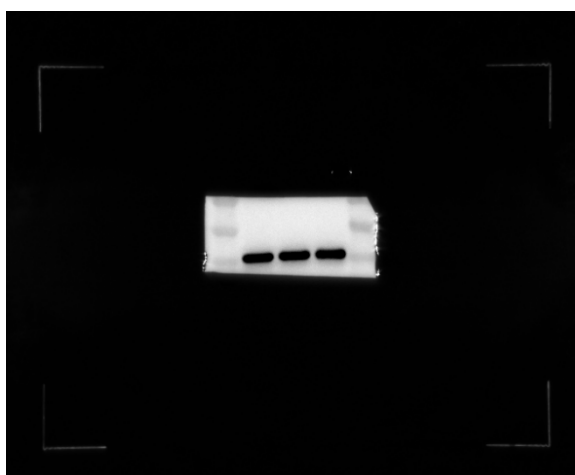

BLACK-GAPDH-GROUP7

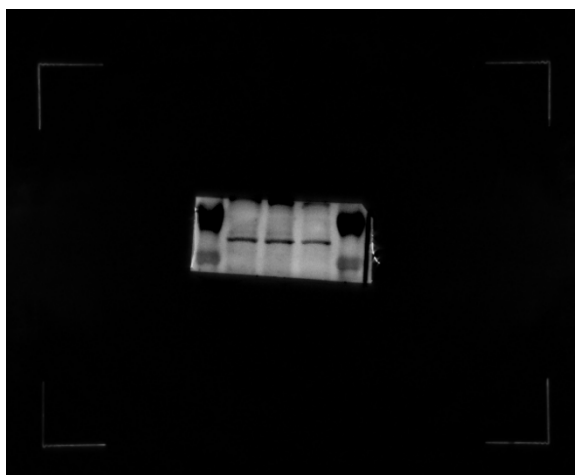

BLACK-INPP5E-GROUP7

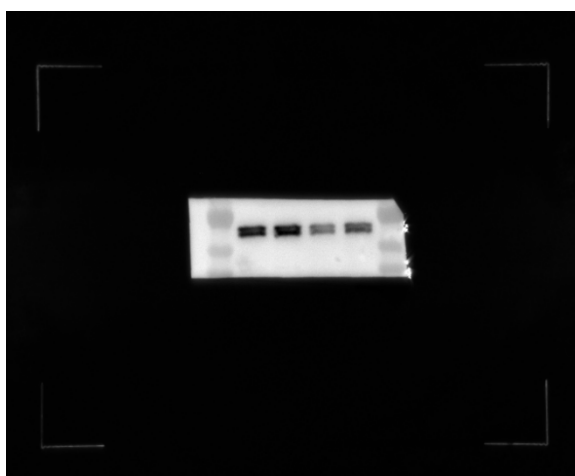

BLACK-Beclin1-GROUP8

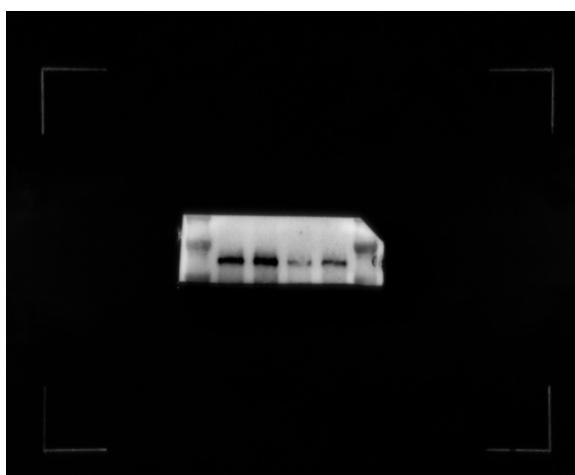

BLACK-COL II-GROUP8

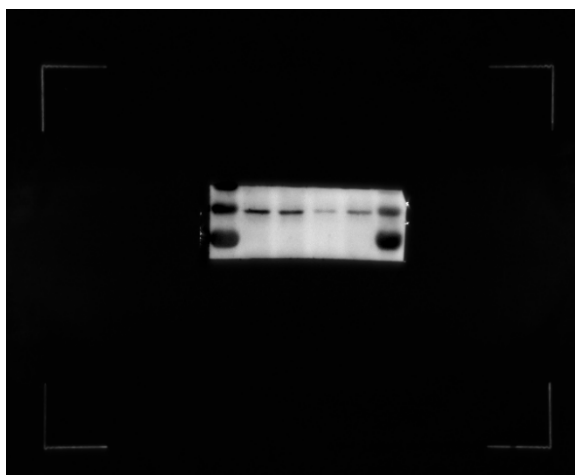

BLACK-Cyclin D1-GROUP8

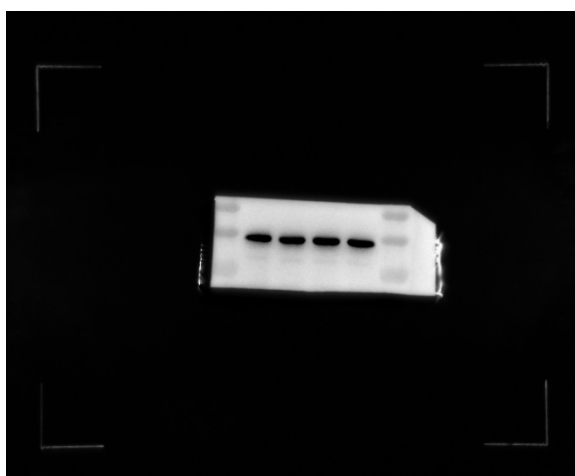

BLACK-GAPDH-GROUP8

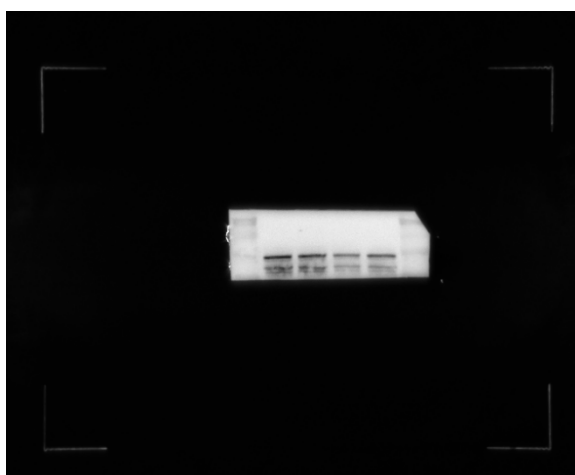

BLACK-IFT88-GROUP8

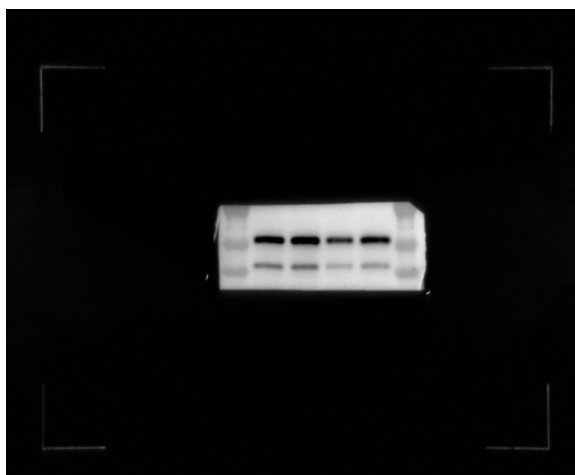

BLACK-LC3-GROUP8

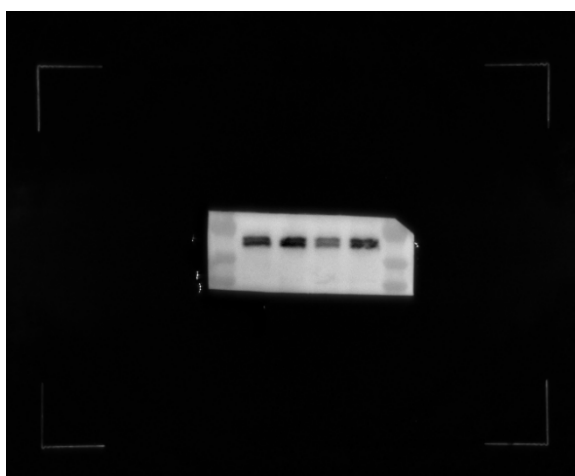

BLACK-BeclinI-GROUP9

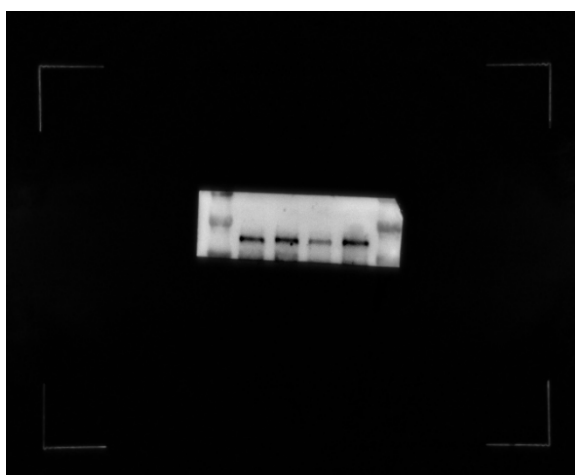

BLACK-COL II-GROUP9

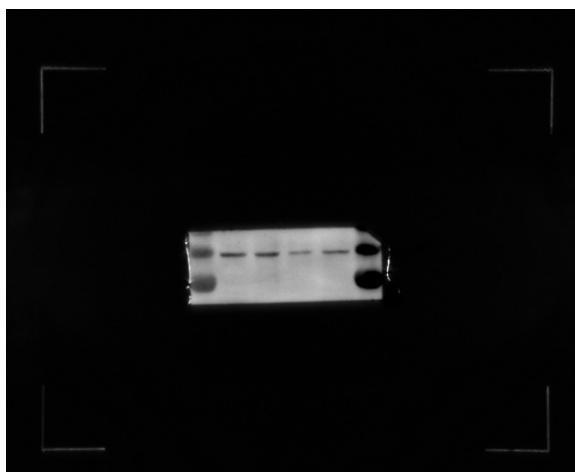

BLACK-Cyclin D1-GROUP9

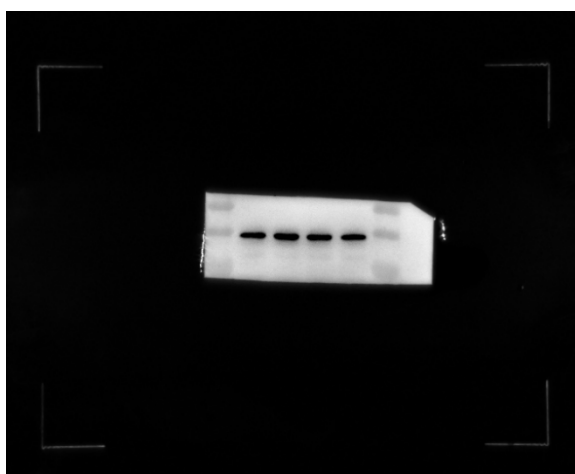

BLACK-GAPDH-GROUP9

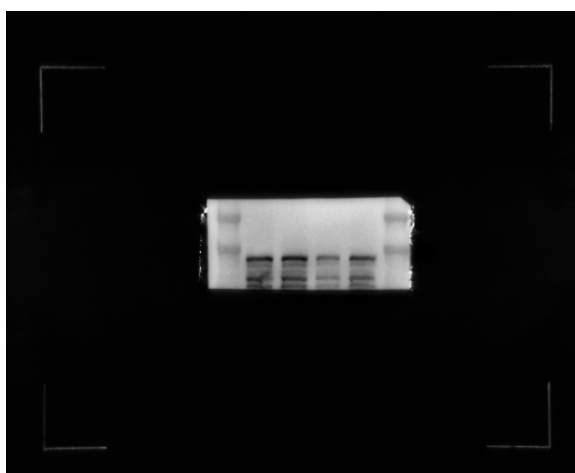

BLACK-IFT88-GROUP9

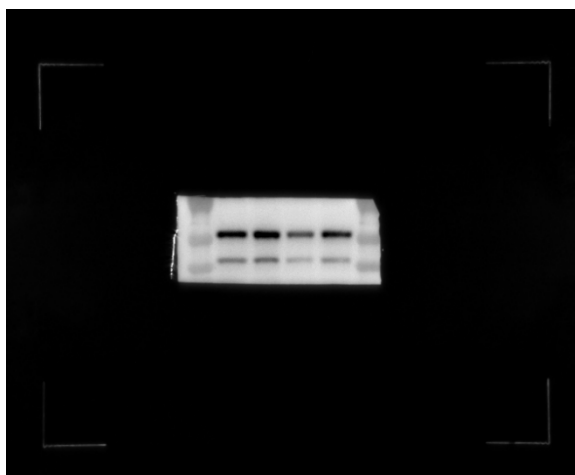

BLACK-LC3-GROUP9

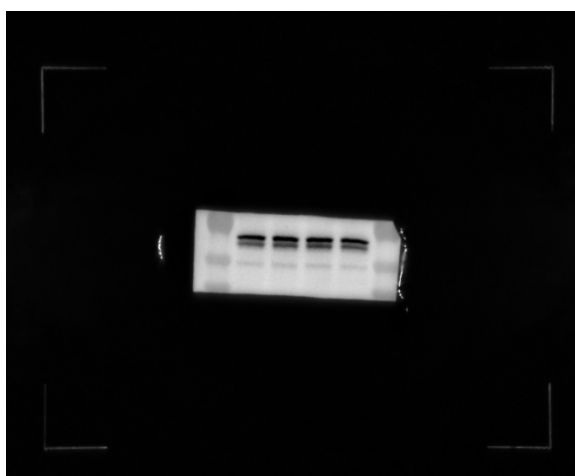

BLACK-Akt-GROUP10

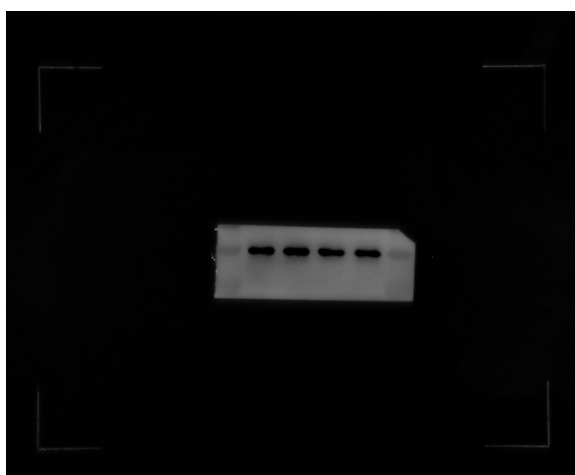

BLACK-GAPDH-GROUP10

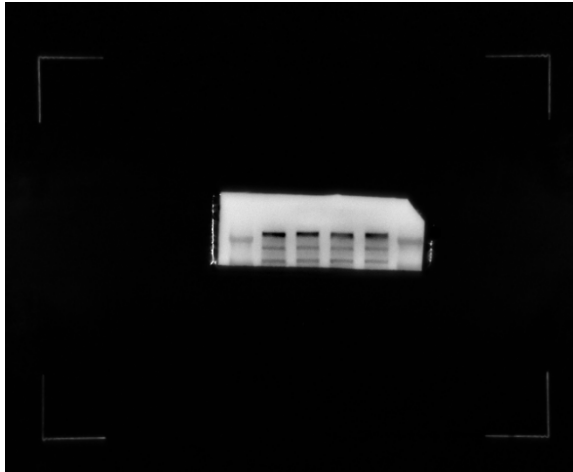

BLACK-mTOR-GROUP10

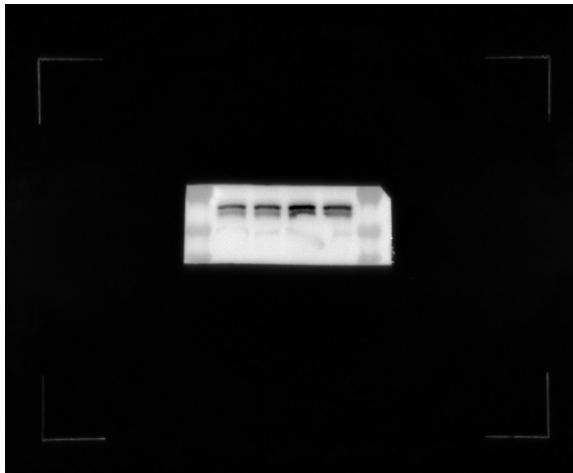

BLACK-p-Akt-GROUP10

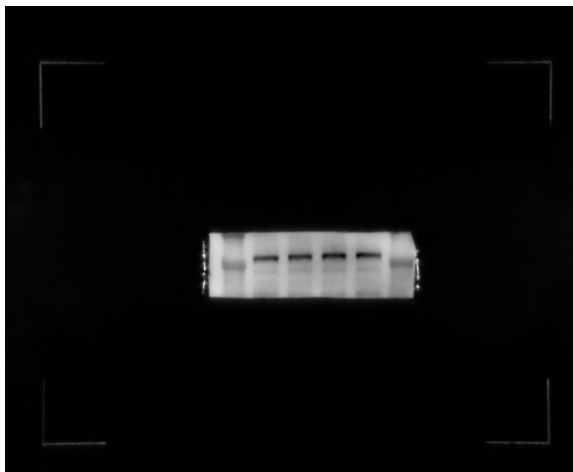

BLACK-PI3K-GROUP10

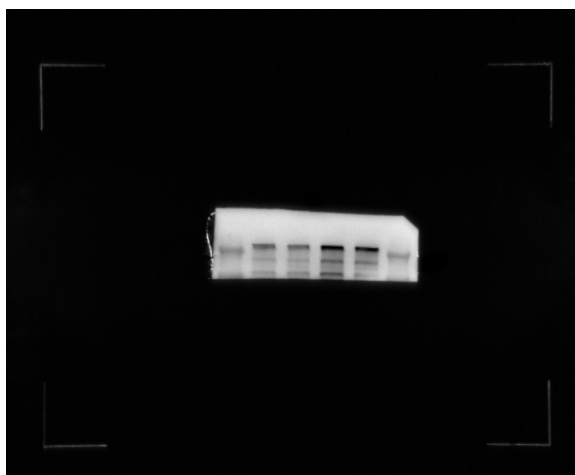

BLACK-p-mTOR-GROUP10

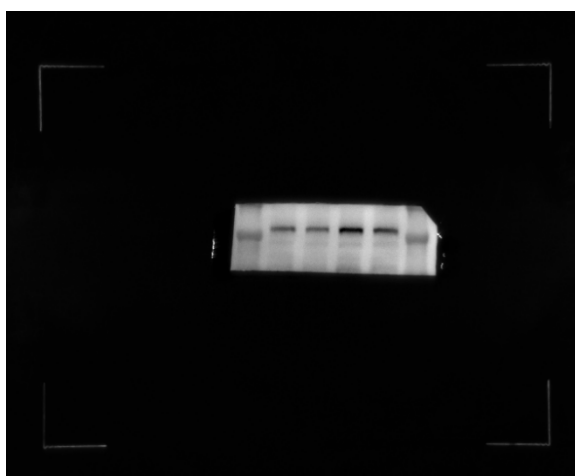

BLACK-p-PI3K-GROUP10

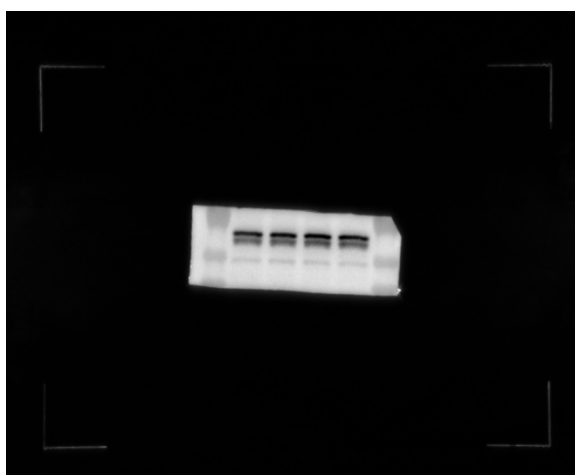

BLACK-Akt-GROUP11

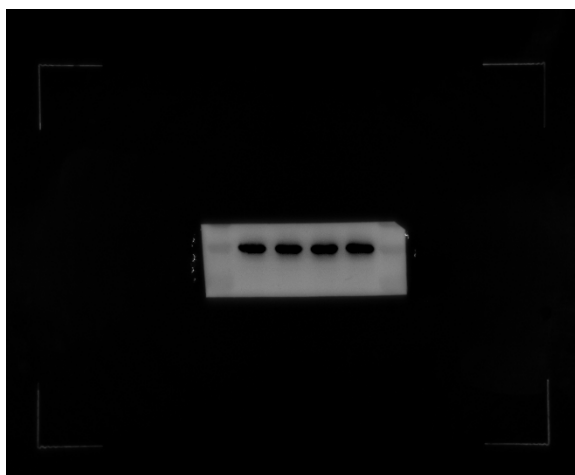

BLACK-GAPDH-GROUP11

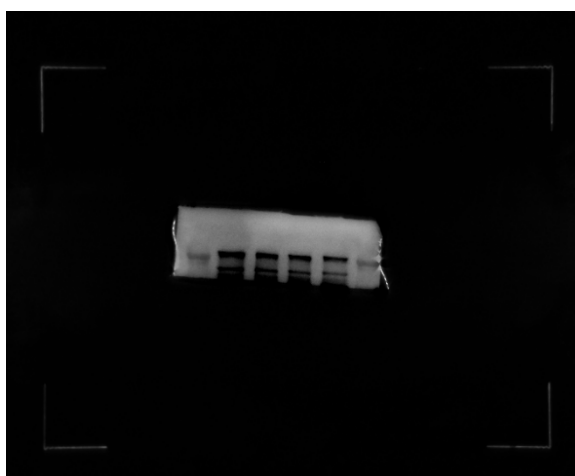

BLACK-mTOR-GROUP11

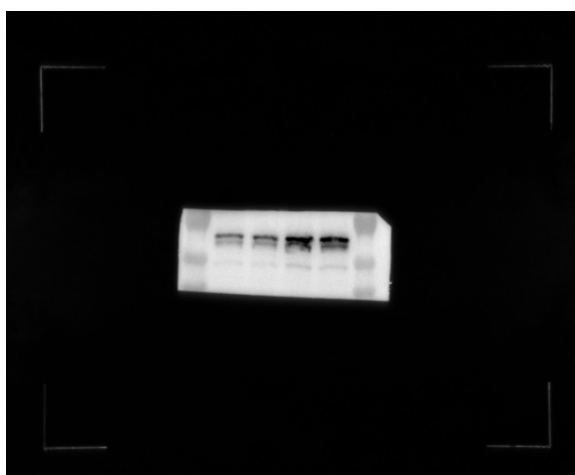

BLACK-p-Akt-GROUP11

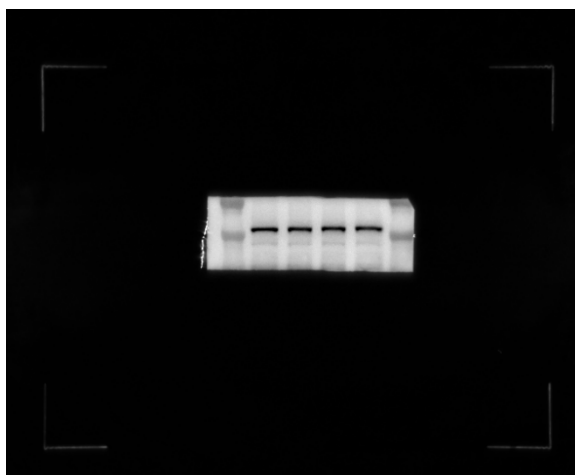

BLACK-PI3K-GROUP11

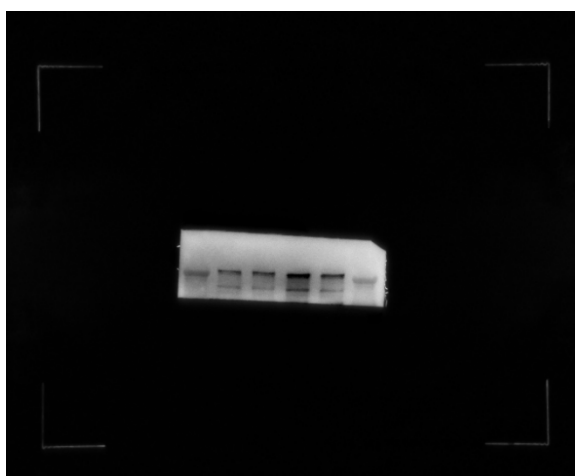

BLACK-p-mTOR-GROUP11

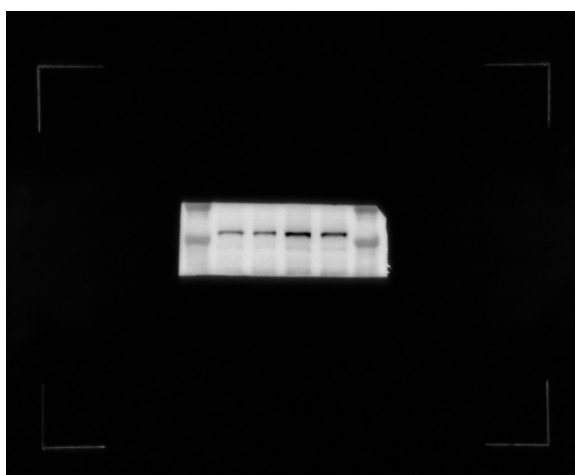

BLACK-p-PI3K-GROUP11

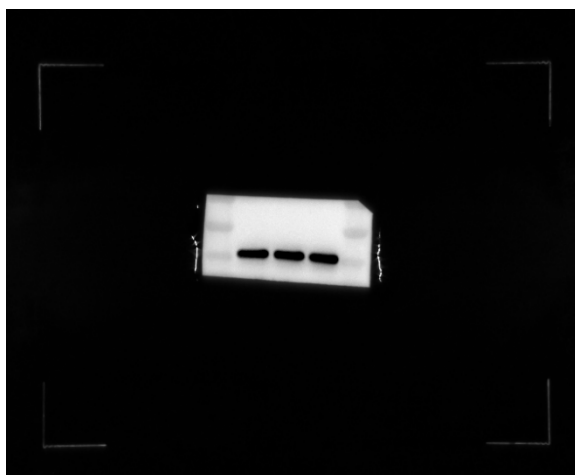

BLACK-GAPDH-GROUP12

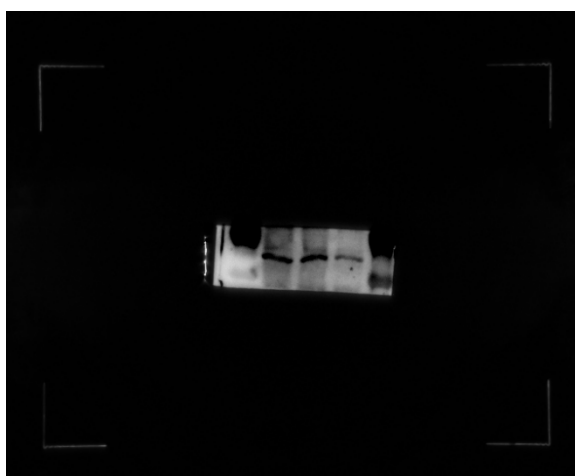

BLACK-INPP5E-GROUP12

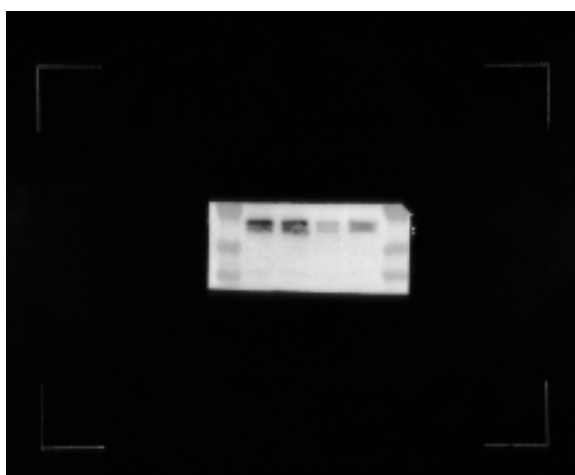

BLACK-Beclin1-GROUP13

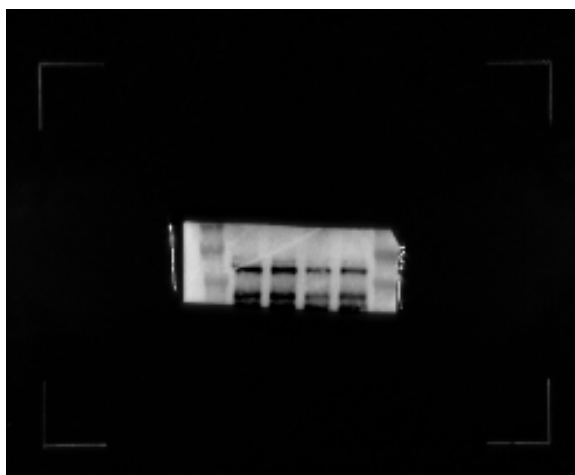

BLACK-COL II-GROUP13

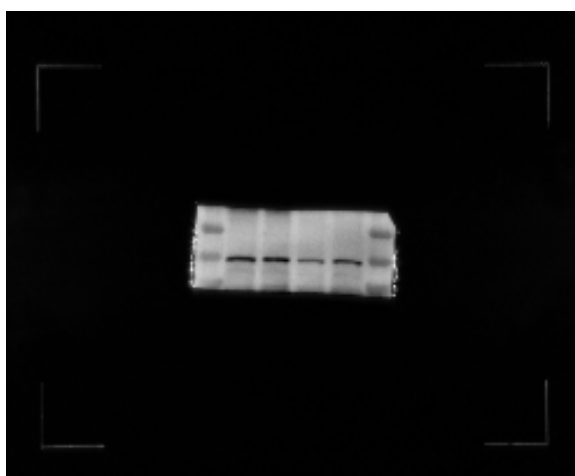

BLACK-Cyclin D1-GROUP13

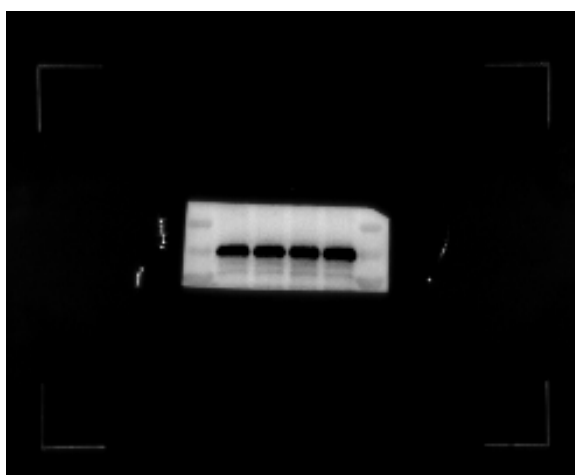

BLACK-GAPDH-GROUP13

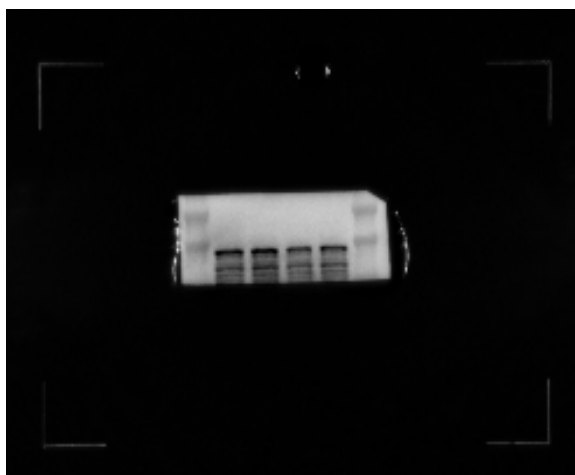

BLACK-IFT88-GROUP13

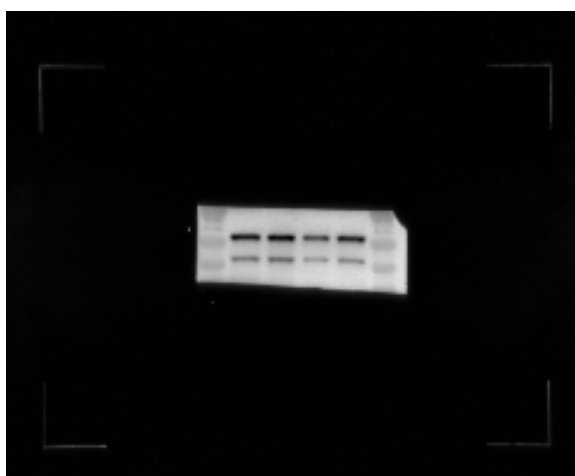

BLACK-LC3-GROUP13

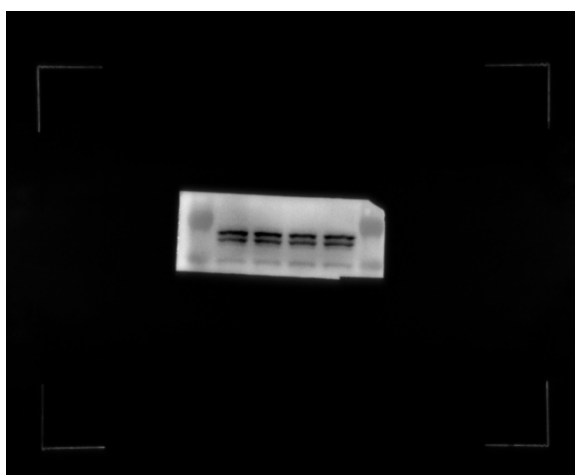

BLACK-Akt-GROUP14

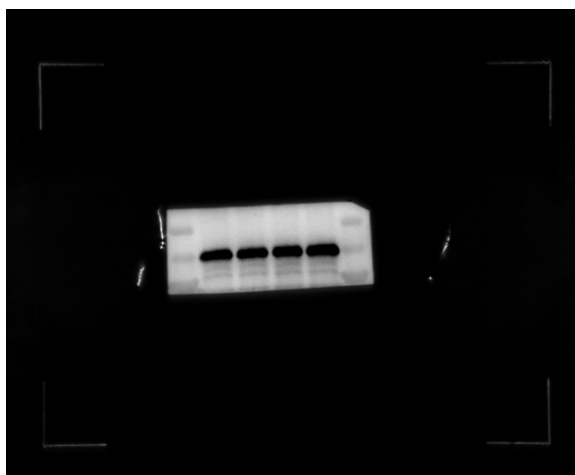

BLACK-GAPDH-GROUP14

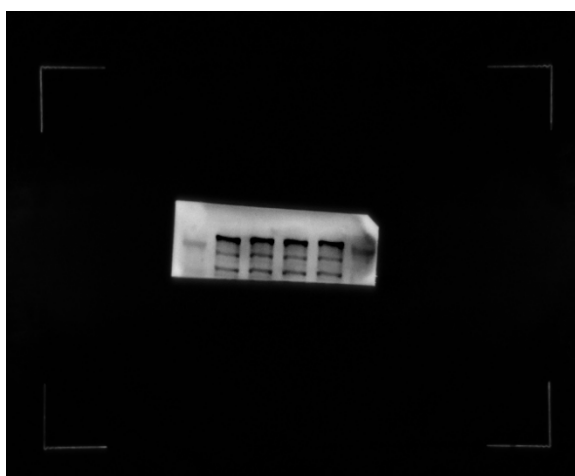

BLACK-mTOR-GROUP14

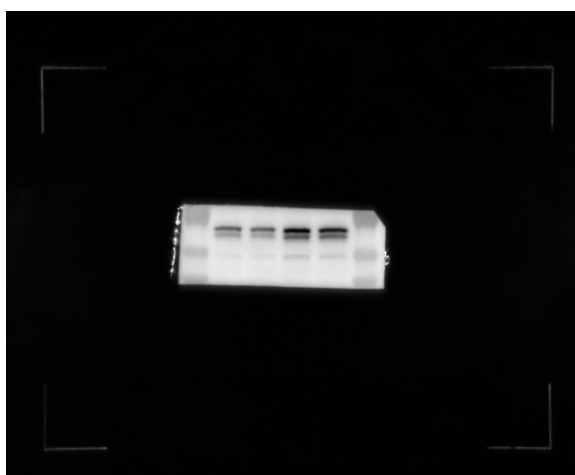

BLACK-p-AKT-GROUP14

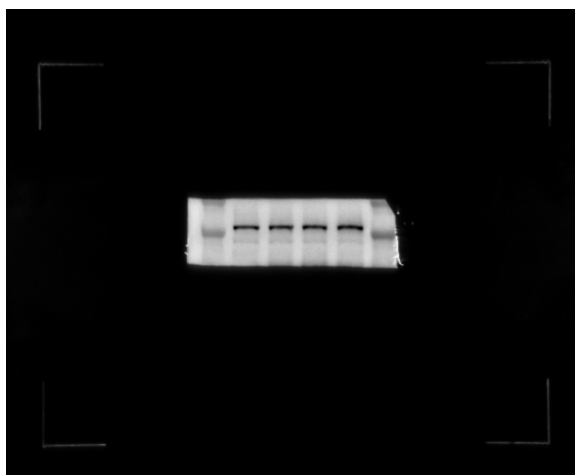

BLACK-PI3K-GROUP14

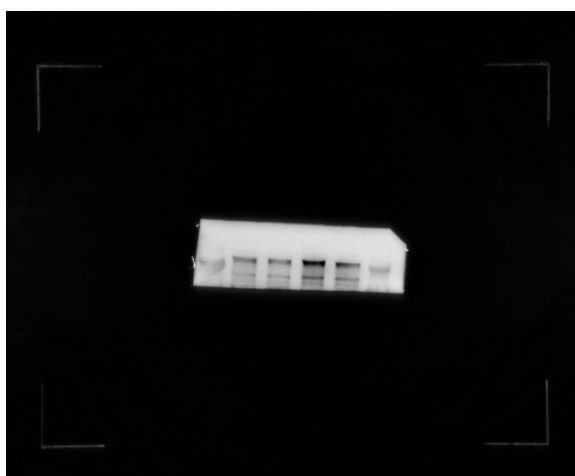

BLACK-p-mTOR-GROUP14

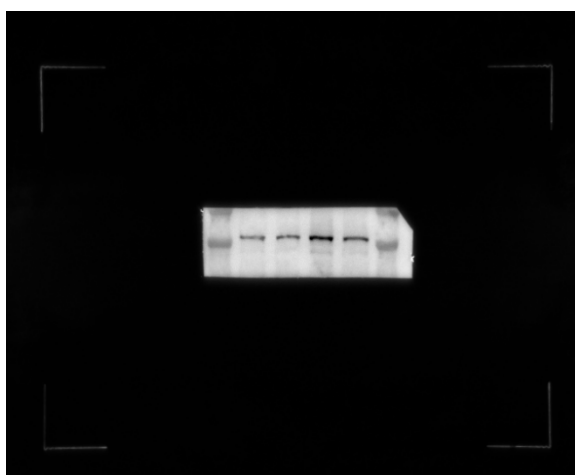

BLACK-p-PI3K-GROUP14
