# Supplementary material for: SNHG12 Promotes Autophagy by Blocking the mTOR-Primary Cilia-mTOR Loop via Activating the miR-181a-5p/miR-138-5p-INPP5E Axis in Chondrocyte
Source: Hindawi journal article supplement (doi:10.1155/2024/4887984), 2024-03-28
Supplement: f1 [file 4887984.f1.zip › Supplementary materials (1).docx]

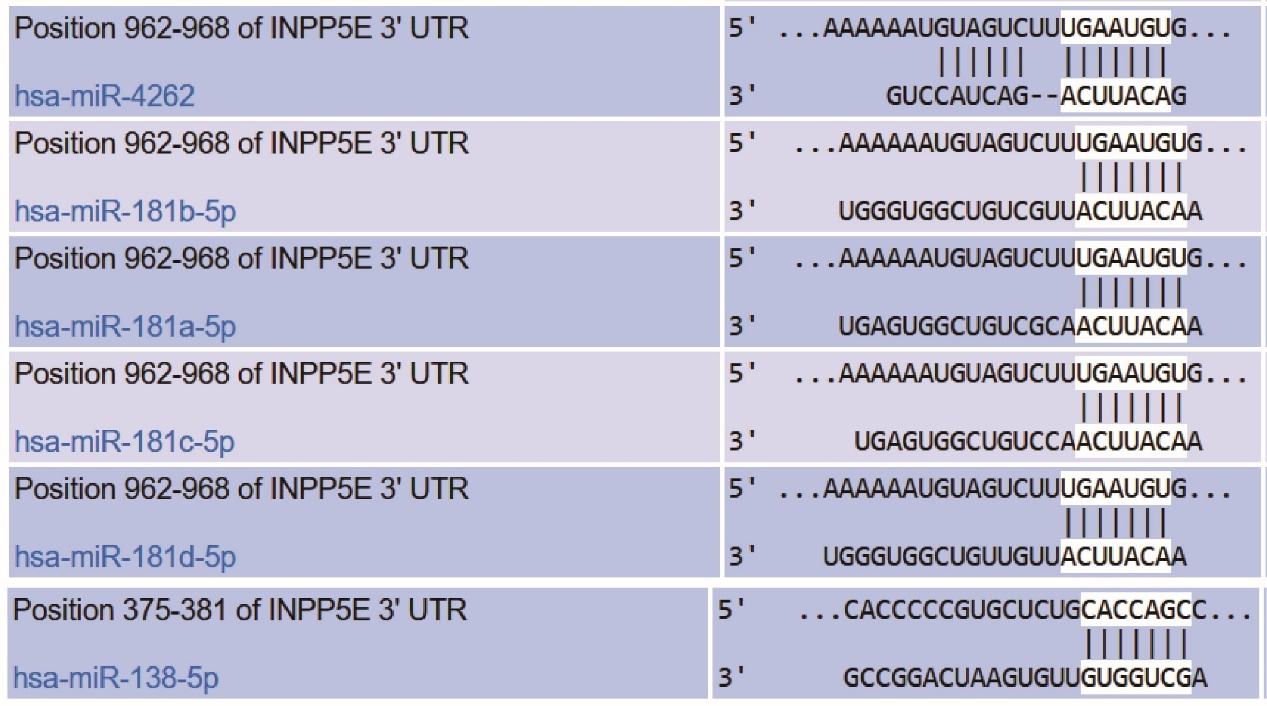


Supplementary figure 1

miRNAs that might bind to INPP5E predicted by Targetscan database

Tables

Supplement table 1. The corresponding plasmids or siRNAs used in this study

| Item | Code |
| --- | --- |
| hsa-miR-138-5p mimic (mimic-1) | miR10000430-1-5 |
| hsa-miR-181a-5p mimic (mimic-2) | miR10000256-1-5 |
| si-INPP5E-1 | [siG000056623A-1-5](https://www.ribobio.com/product_detail/?sku=siG000056623A-1-5) |
| si-INPP5E-2 | [siG000056623B-1-5](https://www.ribobio.com/product_detail/?sku=siG000056623B-1-5) |
| si-INPP5E-3 | [siG000056623C-1-5](https://www.ribobio.com/product_detail/?sku=siG000056623B-1-5) |
| si-SNHG12-1 | [siB160126043434-1-5](https://www.ribobio.com/product_detail/?sku=siB160126043434-1-5) |
| si-SNHG12-2 | [siG180327030147-1-5](https://www.ribobio.com/product_detail/?sku=siG180327030147-1-5) |
| si-SNHG12-3 | [siG180327030156-1-5](https://www.ribobio.com/product_detail/?sku=siG180327030156-1-5) |
| Mimic-negative control (NC) | miR1N0000001-1-5 |
| siRNA-NC | siN0000002-1-5 |

Supplement table 2. All primers used in this study

| Gene | Forward (5’-3’) | Reverse (5’-3’) |
| --- | --- | --- |
| hsa-miR-138-5p | AGTGCAGGGTCCGAGGTATTCG | GTGCAGGGTCCGAGGT |
| hsa-miR-181a-5p | CGCAACATTCAACGCTGTC | GTGCAGGGTCCGAGGT |
| U6 | GCTTCGGCAGCACATATACTAAAAT | CGCTTCACGAATTTGCGTGTCAT |
| GAPDH | GGAGCGAGATCCCTCCAAAAT | GGCTGTTGTCATACTTCTCATGG |
| SNHG12 | GAAAAAGCACACCAGCTATTGG | CGGGATCTCTGTAGACTAAGTCAGT |
| BECN1 | GGTGTCTCTCGCAGATTCATC | TCAGTCTTCGGCTGAGGTTCT |
| IFT88 | TCCTGAAACTTCACGCAATCC | GACCACCTGCATTAGCCATTC |
| MAP1LC3A | AACATGAGCGAGTTGGTCAAG | GCTCGTAGATGTCCGCGAT |
| MAP1LC3B | AAGGCGCTTACAGCTCAATG | CTGGGAGGCATAGACCATGT |
| [COL2A1](https://www.ncbi.nlm.nih.gov/gene/1280) | TGGACGCCATGAAGGTTTTCT | TGGGAGCCAGATTGTCATCTC |
| [CCND1](https://www.ncbi.nlm.nih.gov/gene/595) | GCTGCGAAGTGGAAACCATC | CCTCCTTCTGCACACATTTGAA |

Supplement table 3. The antibodies used in this study.

| Item | Dilution ratio | No. | Country |
| --- | --- | --- | --- |
| Anti-INPP5E antibody | 1:2000 | ab191520 | Abcam, USA |
| Anti-Beclin 1 antibody | 1:1500 | ab207612 | Abcam, USA |
| Anti-LC3 I/II antibody | 1:1500 | ab62721 | Abcam, USA |
| Anti-PI3K antibody | 1:2000 | 4249 | CST, USA |
| Anti-p-PI3K antibody | 1:1500 | ab278545 | Abcam, USA |
| Anti-AKT antibody | 1:2000 | ab108202 | Abcam, USA |
| Anti-p-AKT antibody | 1:1500 | ab38449 | Abcam, USA |
| Anti-mTOR antibody | 1:1500 | ab134903 | Abcam, USA |
| Anti-p-mTOR antibody | 1:1500 | ab109268 | Abcam, USA |
| Anti-Collagen II antibody | 1:2000 | ab188570 | Abcam, USA |
| Anti-Cyclin D1 antibody | 1:1500 | ab16663 | Abcam, USA |
| Anti-GAPDH antibody | 1:2000 | 60004-1-1 | Proteintech, China |
| HRP-labeled goat anti-mouse IgG | 1:2000 | A0216 | Beyotime, China |
| HRP-labeled goat anti-rabbit IgG | 1:2000 | A0208 | Beyotime, China |
